# Supplementary material for: Body mass index and risk of lung cancer: Systematic review and dose-response meta-analysis
Source: PubMed Central journal article supplement (PMC4652238; doi:10.1038/srep16938), 2015-11-19
Supplement: srep16938-s1.pdf [file srep16938-s1.pdf]

**The title of the paper**

Body mass index and risk of lung cancer: Systematic review and dose-response meta-analysis

**The full names of the authors**

Peng Duan<sup>1</sup>, Chunhui Hu<sup>2</sup>, Chao Quan<sup>1</sup>, Xianfu Yi<sup>3</sup>, Wei Zhou<sup>1</sup>, Meng Yuan<sup>1</sup>, Tingting Yu<sup>1</sup>, Ansoumane Kourouma<sup>1</sup> & Kedi Yang<sup>1\*</sup>

**Affiliations of authors**

<sup>1</sup>MOE (Ministry of Education) key lab of Environment and Health, Department of Occupational and Environmental Health, Tongji Medical College, Huazhong University of Science and Technology, Wuhan, Hubei, China;

<sup>2</sup>Department of Clinical Laboratories, the Affiliated Taihe Hospital, Hubei University of Medicine, Shiyan, Hubei, China;

<sup>3</sup>Department of Emergency, the Affiliated Taihe Hospital, Hubei University of Medicine, Shiyan, Hubei, China;

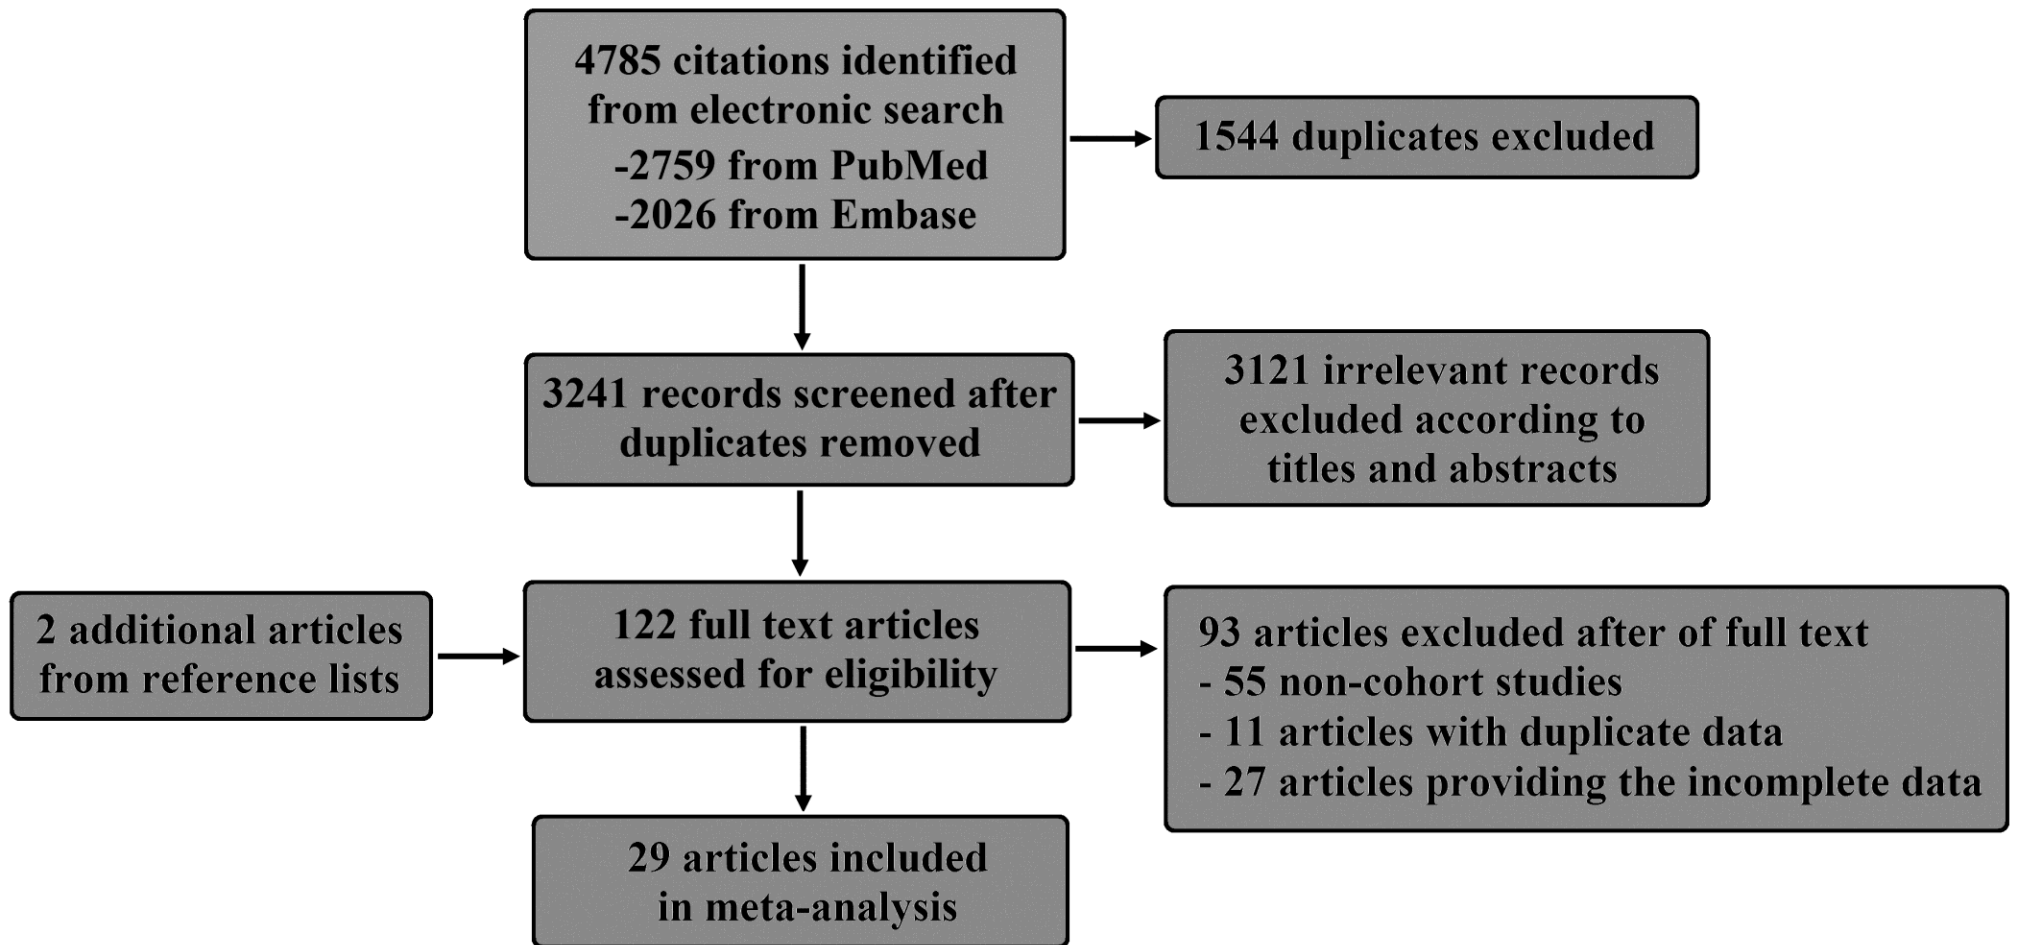

**Figure S1 Flow diagram of literature search and study selection.**

**Table S1.** Characteristics of cohort studies included in meta-analysis

| First author, year, country reference   | Study participants, n                                                                                   | Study period (including follow-up) | Sex and age (mean or range)          | Case ascertainment | Number of cases | Anthropometric measurement | BMI categories (kg/m <sup>2</sup> )                                                              | Relative risk with 95% CI                                                                                                                       | Main Confounders adjusted†   |
|-----------------------------------------|---------------------------------------------------------------------------------------------------------|------------------------------------|--------------------------------------|--------------------|-----------------|----------------------------|--------------------------------------------------------------------------------------------------|-------------------------------------------------------------------------------------------------------------------------------------------------|------------------------------|
| Guo L, 2014, China <sup>1</sup>         | Chinese cohort of Kailuan Company, n=133,273                                                            | 2006-2011                          | Men, 51.07±13.54 yrs                 | Cancer registry    | 386             | Direct measured            | <18.5<br>18.5-24.0<br>24.0-28.0<br>>28.0                                                         | 1.38(0.82-2.35);<br>1;<br>0.62(0.46-0.76);<br>0.69(0.44-0.92)                                                                                   | 1, 2, 3, 5                   |
| Everatt R, 2014, Lithuania <sup>2</sup> | Kaunas-Rotterdam Intervention Study and Multifactorial ischemic heart disease prevention study, n=6,729 | 1978–2008                          | Men, 52.7+5.7 yrs                    | Cancer registry    | 358             | Direct measured            | <25.0<br>25.0-29.9<br>>30.0                                                                      | 1;<br>0.81(0.65-1.02);<br>0.69(0.49-0.97)                                                                                                       | 1, 2, 3, 5                   |
| Bethea TN, 2013, USA <sup>3</sup>       | The Black Women's Health Study, n=56,835                                                                | 1995-2011                          | Women, mean age in 1995 was 38.6 yrs | Cancer registry    | 323             | Self-reported              | <18.5<br>18.5-24.9<br>25.0-29.0<br>≥30                                                           | 2.7(1.36-5.42);<br>1;<br>0.85(0.65-1.11);<br>0.69(0.52-0.93)                                                                                    | 1, 2, 3, 4, 5, 9, 11, 13, 15 |
| Hatlen P, 2013, Norway <sup>4</sup>     | The Nord-Trøndelag Health Study, n= 6,996                                                               | 1996-2008                          | Men and women, 68 y ±9 yrs           | Cancer registry    | 132             | Direct measured            | Women<br><18.5<br>18.5-24.9<br>25.0-29.9<br>≥30<br>Men<br><18.5<br>18.5-24.9<br>25.0-29.9<br>≥30 | Women<br>1.02(0.14-7.59);<br>1;<br>0.49(0.29-0.81);<br>0.54(0.31-0.95)<br>Men<br>5.16(1.39-19.10);<br>1;<br>0.83(0.48-1.41);<br>0.67(0.32-1.38) | 1, 2                         |
| Lam TK, 2013, USA <sup>5</sup>          | National Institute of Health (NIH)-AARP Diet and Health Study, n=337,074                                | 1995-2006                          | Men and women, 50-71 yrs             | Cancer registry    | 532             | Direct measured            | <18.5<br>18.5-25.0<br>25.0-30.0<br>≥30                                                           | 1.57(0.77-3.19);<br>1;<br>1(0.81-1.22);<br>1.21(0.95-1.53)                                                                                      | 1, 3, 4, 5, 7, 17            |

|                                    |                                                                     |           |                                    |                 |      |                 |                                                                                                                                                      |                                                                                                                                                                                                                             |                            |
|------------------------------------|---------------------------------------------------------------------|-----------|------------------------------------|-----------------|------|-----------------|------------------------------------------------------------------------------------------------------------------------------------------------------|-----------------------------------------------------------------------------------------------------------------------------------------------------------------------------------------------------------------------------|----------------------------|
| Smith L, 2012, USA <sup>6</sup>    | National Institutes of Health–AARP Diet and Health Study, n=448,732 | 1995-2006 | Men and women, 50-71 yrs           | Cancer registry | 9415 | Direct measured | Men<br><18.5<br>18.5-22.49<br>22.5-24.99<br>25-29.99<br>30-34.99<br>>35<br>Women<br><18.5<br>18.5-22.49<br>22.5-24.99<br>25-29.99<br>30-34.99<br>>35 | Men<br>1.15(0.83-1.59);<br>1.12(1.02-1.23);<br>1;<br>0.92(0.86-0.99);<br>0.87(0.80-0.98);<br>0.81(0.7-1.0)<br>Women<br>1.23(0.97-1.54);<br>1.15(1.04-1.26);<br>1;<br>0.99(0.9-1.08);<br>0.85(0.75-0.96);<br>0.73(0.61-0.87) | 1, 2, 3, 4, 5, 7, 12       |
| Leung CC, 2010, China <sup>7</sup> | The Elderly Health Service, n=64,574                                | 2000-2008 | Men and women, ≥65 yrs             | Cancer registry | 932  | Direct measured | <18.5<br>18.5-23.0<br>23.0-25.0<br>25.0-30.0<br>>30                                                                                                  | 1.20(0.86-1.68);<br>1;<br>0.82(0.66-1.01);<br>0.83(0.68-1.00);<br>0.49(0.31-0.79)                                                                                                                                           | 1, 2, 5, 6, 26             |
| Dehal A, 2011, USA <sup>8</sup>    | National Health and Nutrition Examination Survey, n=14,407          | 1971-1992 | Women, 25-47 yrs                   | Cancer registry | 124  | Direct measured | 18.5-24.9<br>25.0-29.9<br>≥30                                                                                                                        | 1;<br>0.87(0.59-1.28);<br>0.98(0.57-1.70)                                                                                                                                                                                   | 2, 5, 6, 7, 15, 16, 20, 26 |
| Parr CL, 2010, Norway <sup>9</sup> | The Asia-Pacific Cohort Studies Collaboration, n=424,519            | 1961-1999 | Men and women, mean age was 48 yrs | Cancer registry | 1478 | Direct measured | <18.5<br>18.5-25.0<br>25.0-30.0<br>≥30                                                                                                               | 1.11(0.86-1.44);<br>1(0.92-1.09);<br>0.68(0.59-0.79);<br>0.83(0.64-1.08)                                                                                                                                                    | 1, 2, 5                    |

|                                      |                                                    |           |                          |                   |       |                 |                                                                                                                            |                                                                                                                                                                                      |                                        |
|--------------------------------------|----------------------------------------------------|-----------|--------------------------|-------------------|-------|-----------------|----------------------------------------------------------------------------------------------------------------------------|--------------------------------------------------------------------------------------------------------------------------------------------------------------------------------------|----------------------------------------|
| Andreotti G, 2010, USA <sup>10</sup> | Details of the Agricultural Health Study, n=57,310 | 1993-2005 | Men and women, 40-69 yrs | Cancer registry   | 357   | Self-reported   | Men<br>18.5-25.0<br>25.0-30.0<br>30-35<br>>35<br>Women<br>18.5-25.0<br>25.0-30.0<br>30.0-35.0                              | Men<br>1;<br>0.85(0.60-1.2);<br>0.85(0.54-1.35);<br>0.47(0.15-1.49)<br>Women<br>1;<br>0.99(0.63-1.55);<br>0.67(0.33-1.38)                                                            | 2, 4, 7, 15, 20                        |
| Koh WP, 2010, China <sup>11</sup>    | The Singapore Chinese Health Study, n=63,257       | 1993-2006 | Men and women, 45-74 yrs | Cancer registry   | 1042  | Self-reported   | <20<br>20-24<br>24-28<br>≥28                                                                                               | 1.34(0.98-1.83);<br>1;<br>0.91(0.66-1.25);<br>0.90(0.65-1.25)                                                                                                                        | 1, 2, 3, 6, 9, 10                      |
| Song YM, 2008, Korea <sup>12</sup>   | Postmenopausal Korean women, n=170,481             | 1994-2003 | Women, 40-64 yrs         | Cancer registry   | 621   | Direct measured | <18.5<br>18.5-20.9<br>21.0-22.9<br>23.0-24.9<br>25.0-29.9<br>≥30                                                           | 1.80(1.18-2.73);<br>1.34(1.00-1.18);<br>1;<br>1.05(0.81-1.35);<br>1.17(0.90-1.52);<br>0.48(0.24-0.94)                                                                                | 1, 2, 4, 5, 6, 16                      |
| Kabat GC, 2008, USA <sup>13</sup>    | The Women's Health Initiative, n=161,809           | 1980-2000 | Women, 50-79 yrs         | Pathology reports | 1365  | Direct measured | <23.1<br>23.1-25.6<br>25.6-28.3<br>28.3-32.2<br>≥32.2                                                                      | 1;<br>1.04(0.88-1.23);<br>0.77 (0.64-0.93);<br>0.81(0.68-0.98);<br>0.79(0.65,0.96)                                                                                                   | 1, 2, 3, 4, 5, 6, 7, 9, 17, 19, 20, 23 |
| Jee SH, 2008, Korea <sup>14</sup>    | Korean Cancer Prevention Study, n=1,329,525        | 1992-2006 | Men and women, 30-95 yrs | Cancer registry   | 11297 | Direct measured | Men<br><20.0<br>20.0-22.9<br>23.0-24.9<br>25.0-29.9<br>≥30<br>Women<br><20.0<br>20.0-22.9<br>23.0-24.9<br>25.0-29.9<br>≥30 | Men<br>1.35(1.24-1.47);<br>1.13(1.05-1.21);<br>1;<br>0.92(0.84-1.0);<br>1.29(0.96-1.73)<br>Women<br>1.20(1.00-1.44);<br>1.18(1.02-1.37);<br>1;<br>1.1(0.94-1.29);<br>0.91(0.63-1.33) | 1, 2, 4, 5                             |
| Kabat GC, 2007, USA <sup>15</sup>    | Canadian National Breast Screening Study, n=19,352 | 1980-2000 | Women, 40-59 yrs         | Cancer registry   | 520   | Direct measured | Never smokers<br><21.6<br>21.6-23.3                                                                                        | Never smokers<br>1;<br>0.91(0.36-2.31);<br>1.97(0.88-4.41);                                                                                                                          | 1, 2, 3, 6, 9, 10                      |

|                                           |                                                            |           |                             |                 |      |                 |                                                                                                                                                                                    |                                                                                                                                                                                                                                              |                                  |
|-------------------------------------------|------------------------------------------------------------|-----------|-----------------------------|-----------------|------|-----------------|------------------------------------------------------------------------------------------------------------------------------------------------------------------------------------|----------------------------------------------------------------------------------------------------------------------------------------------------------------------------------------------------------------------------------------------|----------------------------------|
|                                           |                                                            |           |                             |                 |      |                 | 23.3-25.1<br>25.1-27.9<br>≥27.9<br>Current smokers<br><21.6<br>21.6-23.3<br>23.3-25.1<br>25.1-27.9<br>≥27.9<br>Ex-smokers<br><21.6<br>21.6-23.3<br>23.3-25.1<br>25.1-27.9<br>≥27.9 | 1.81(0.80-4.06);<br>2.19(1.0-4.8)<br>Current smokers<br>1;<br>0.77(0.60-0.99);<br>0.77(0.60-1.00);<br>0.64(0.49-0.85);<br>0.63(0.48-0.83)<br>Ex-smokers<br>1;<br>1.06(0.63-1.80);<br>0.65(0.36-1.16);<br>0.47(0.25-0.88);<br>0.69(0.39-1.23) |                                  |
| Reeves GK,<br>2007, UK <sup>16</sup>      | The million women study,<br>n=1,222,630                    | 1996-2001 | Women, 50-64<br>yrs         | Cancer registry | 3171 | Self-reported   | <22.5<br>22.5-24.9<br>25.0-27.4<br>27.5-29.5<br>≥30                                                                                                                                | 1.17(1.09-1.25);<br>1;<br>0.91(0.85-0.99);<br>0.83(0.75-0.91);<br>0.84(0.77-0.92)                                                                                                                                                            | 1, 2, 4, 5, 6, 11,<br>15, 16, 23 |
| Samanic C,<br>2006, Sweden <sup>17</sup>  | Workers in the construction<br>industry, n=362,552         | 1971-1999 | Men, 18-67 yrs              | Cancer registry | 2831 | Direct measured | 18.5-24.9<br>25.0-29.9<br>≥30                                                                                                                                                      | 1;<br>0.80(0.74-0.87)<br>0.74(0.63-0.88)                                                                                                                                                                                                     | 1, 2, 6                          |
| Lukanova A,<br>2006, Sweden <sup>18</sup> | The Northern Sweden Health and<br>Disease Cohort, n=74,207 | 1985-2003 | Men and women,<br>30-60 yrs | Cancer registry | 95   | Direct measured | Men<br>18.5-23.4<br>23.5-25.3<br>25.4-27.6<br>≥27.7<br>Women<br>18.5-22.1<br>22.2-24.2<br>24.3-27.0<br>≥27.1                                                                       | Men<br>1;<br>0.84(0.41-1.73);<br>0.84(0.44-1.78)<br>0.72(0.34-1.49)<br>Women<br>1;<br>0.85(0.36-1.98);<br>0.97(0.44-2.20);<br>1.26(0.6-2.75)                                                                                                 | 1, 2                             |
| Batty GD,<br>2005, UK <sup>19</sup>       | The Whitehall Study, n=18,403                              | 1967-2002 | Men, 40-64 yrs              | Cancer registry | 783  | Direct measured | 18.5-24.9<br>25.0-29.9<br>≥30                                                                                                                                                      | 1;<br>0.85(0.73-0.98)<br>0.77(0.51-1.15)                                                                                                                                                                                                     | 1, 4, 5, 6                       |

|                                       |                                                                   |           |                          |                 |       |                 |                                                                                                                       |                                                                                                                                                                    |                                     |
|---------------------------------------|-------------------------------------------------------------------|-----------|--------------------------|-----------------|-------|-----------------|-----------------------------------------------------------------------------------------------------------------------|--------------------------------------------------------------------------------------------------------------------------------------------------------------------|-------------------------------------|
| Kuriyama S, 2005, Japan <sup>20</sup> | Residents in 3 municipalities of Miyagi Prefecture, n=27,539      | 1984-1992 | Men and women, ≥40 yrs   | Cancer registry | 193   | Self-reported   | Women<br>18.5-24.9<br>25.0-27.4<br>27.5-29.9<br>≥30<br>Men<br>18.5-24.9<br>25.0-27.4<br>27.5-29.9<br>≥30              | Women<br>1;<br>0.39(0.14-1.10);<br>0.44(0.10-1.82);<br>1.72(0.6-4.91)<br>Men<br>1;<br>0.77(0.47-1.26);<br>0.30(0.07-1.20);<br>0.29(0.20-3.26)                      | 1, 2, 5, 11, 18,<br>19, 20, 26      |
| Rapp K, 2005, Austria <sup>21</sup>   | The Vorarlberg Health Monitoring and Promotion Program, n=145,931 | 1985-2002 | Men and women, 35-54 yrs | Cancer registry | 590   | Direct measured | Men<br>18.5-24.9<br>25.0-29.9<br>30.0-34.9<br>≥35<br>Women<br>18.5-24.9<br>25.0-29.9<br>30.0-34.9                     | Men<br>1;<br>0.80(0.66-0.97);<br>0.80(0.65-1.20)<br>0.79(0.41-1.86)<br>Women<br>1;<br>0.99 (0.68-1.48);<br>0.87(0.50-1.5)                                          | 1, 2, 21                            |
| Oh SW, 2005, Korea <sup>22</sup>      | Korea National Health Insurance Corporation, n=781,283            | 1992-2001 | Men, ≥20 yrs             | Cancer registry | 2264  | Direct measured | <18.5<br>18.5-22.9<br>23.0-24.9<br>25.0-26.9<br>27.0-29.9<br>≥30                                                      | 1.26(0.98-1.61);<br>1;<br>0.88(0.80-0.97);<br>0.80(0.70-0.90)<br>0.78(0.65-0.94)<br>0.77(0.47-1.30)                                                                | 1, 2, 4, 5, 6, 14,<br>15            |
| Liu EJ, 2004, China <sup>23</sup>     | Male residents of urban Shanghai, n=18,244                        | 1986-2003 | Men, 45-64 yrs           | Cancer registry | 467   | Self-reported   | <19.5<br>19.5-21.1<br>21.2-22.7<br>22.8-24.5<br>≥24.6                                                                 | 1;<br>0.8(0.6-1.1);<br>0.8(0.6-1.1);<br>0.6(0.4-0.9);<br>0.60(0.50-0.90)                                                                                           | 1, 3, 5, 6, 8, 9, 12                |
| Calle EE, 2003, USA <sup>24</sup>     | Cancer Prevention Study II, n=1,184,617                           | 1982-1998 | Men and women, ≥45 yrs   | Cancer registry | 15255 | Direct measured | Men<br>18.5-24.9<br>25.0-29.9<br>30.0-34.9<br>≥35<br>Women<br>18.5-24.9<br>25.0-29.9<br>30.0-34.9<br>35.0-39.9<br>≥40 | Men<br>1;<br>0.78(0.75-0.82);<br>0.78(0.73-0.86);<br>0.67(0.54-0.84)<br>Women<br>1;<br>0.88(0.83-0.94);<br>0.82(0.72-0.92);<br>0.66(0.50-0.86);<br>0.66(0.52-1.28) | 1, 2, 3, 4, 5, 7,<br>19, 20, 23, 26 |

|                                      |                                                                 |           |                        |                   |     |                 |                                                                                                                     |                                                                                                                                               |                               |
|--------------------------------------|-----------------------------------------------------------------|-----------|------------------------|-------------------|-----|-----------------|---------------------------------------------------------------------------------------------------------------------|-----------------------------------------------------------------------------------------------------------------------------------------------|-------------------------------|
| Olson JE, 2002, USA <sup>25</sup>    | Iowa Women's Health Study, n=38,006                             | 1986-1998 | Women, 55-69 yrs       | pathology reports | 532 | Self-reported   | $\leq 22.89$<br>22.90-25.04<br>25.05-27.43<br>27.44-30.69<br>$\geq 30.70$                                           | 1;<br>0.92(0.73-1.16);<br>0.76(0.58-0.98);<br>0.69(0.52-0.90);<br>0.66(0.50-0.89)                                                             | 1, 2, 3, 4, 5, 6, 9           |
| Drinkard CR, 1995, USA <sup>26</sup> | Women with a valid Iowa driver's license, n=41,837              | 1986-1992 | Women, 55-69 yrs       | Cancer registry   | 233 | Self-reported   | $\leq 23.45$<br>23.45-26.11<br>26.12-29.68<br>$\geq 29.68$                                                          | 1;<br>0.54(0.38-0.77);<br>0.52(0.37-0.74);<br>0.52(0.36-0.74)                                                                                 | 1, 2, 3, 4, 5, 6, 9, 10       |
| Kark JD, 1995, Israel <sup>27</sup>  | The Israel Civil Servant Study, n=9,975                         | 1963-1986 | Men, 40-69 yrs         | Cancer Registry   | 153 | Direct measured | $\geq 28.32$<br>26.44-28.31<br>24.82-26.43<br>22.93-24.81<br>22.27-22.92<br>21.38-22.26<br>20.18-21.37<br>$< 20.18$ | 1;<br>1.10(0.60-2.02);<br>1.09(0.60-1.99);<br>1.27(0.72-2.24);<br>1.36(0.62-2.98);<br>2.26(1.14-4.48);<br>2.78(1.44-5.38);<br>2.85(1.51-5.35) | 1, 2, 4, 5, 6, 11, 15, 16, 23 |
| Chyou PH, 1994, USA <sup>28</sup>    | Honolulu Heart Program, n=7,840                                 | 1965-1988 | Men, for age not given | Cancer registry   | 236 | Direct measured | $\leq 22.0$<br>22.0-23.9<br>24.0-25.9<br>$\geq 26.0$                                                                | 1;<br>0.85(0.60-1.20);<br>0.85(0.67-1.33);<br>0.69(0.46-1.02)                                                                                 | 1, 2, 6, 10                   |
| Knekt P, 1991, Finland <sup>29</sup> | The Social Insurance Institution's Mobile Clinic Unit, n=25,994 | 1966-1984 | Men, 20-75 yrs         | Cancer registry   | 504 | Direct measured | $\geq 27.0$<br>25.1-27.0<br>22.6-25.0<br>$< 22.5$                                                                   | 1;<br>1.4(1.0-1.9);<br>1.5(1.2-2.0);<br>1.8(1.4-2.4)                                                                                          | 1, 2, 6, 12, 15, 16           |

†Main confounders adjusted for: 1, age; 2, smoking; 3, education; 4, physical activity; 5, alcohol consumption; 6, gender; 7, ethnicity; 8, age started smoking; 9, pack-years of smoking; 10, number of years since quitting smoking for former smoker; 11, reproductive history; 12, previous chronic bronchitis; 13, family history of lung cancer; 14, family history of cancer; 15, residency area; 16, socioeconomic status; 17, calories intake; 18, fish consumption; 19, fat intake; 20, fruit and vegetable consumption; 21, occupational exposures; 22, exposure to cooking oil fumes; 23, replacement therapy; 24, hypertension; 25, age at menarche; 26, marital status. BMI, body mass index; n, number of study participants; yrs, years; CI, confidence interval.



**Table S2.** Methodological quality of studies included in the meta-analysis\*

| First author, year, country<br>reference | Representativeness<br>of the exposed<br>cohort | Selection of the<br>unexposed<br>cohort | Exposure<br>assessments | Outcome of interest<br>not present at the<br>start of the study | Control for<br>important factors or<br>additional factors† | Outcome<br>assessments | Follow-up period<br>long enough for<br>outcomes to occur‡ | Adequacy of<br>follow-up of<br>cohorts§ | Total<br>quality<br>scores |
|------------------------------------------|------------------------------------------------|-----------------------------------------|-------------------------|-----------------------------------------------------------------|------------------------------------------------------------|------------------------|-----------------------------------------------------------|-----------------------------------------|----------------------------|
| Guo L, 2014, China <sup>1</sup>          | ★                                              | ★                                       | ★                       | ★                                                               | ★★                                                         | ★                      | —                                                         | —                                       | 7                          |
| Everatt R, 2014, Lithuania <sup>2</sup>  | ★                                              | ★                                       | ★                       | ★                                                               | ★★                                                         | ★                      | ★                                                         | ★                                       | 9                          |
| Bethea TN, 2013, USA <sup>3</sup>        | —                                              | ★                                       | ★                       | ★                                                               | ★★                                                         | ★                      | ★                                                         | ★                                       | 8                          |
| Hatlen P, 2013, Norway <sup>4</sup>      | —                                              | ★                                       | ★                       | ★                                                               | ★★                                                         | —                      | ★                                                         | —                                       | 6                          |
| Lam TK, 2013, USA <sup>5</sup>           | ★                                              | ★                                       | ★                       | ★                                                               | ★★                                                         | —                      | ★                                                         | ★                                       | 8                          |
| Smith L, 2012, USA <sup>6</sup>          | ★                                              | ★                                       | ★                       | ★                                                               | ★★                                                         | ★                      | ★                                                         | ★                                       | 9                          |
| Leung CC, 2010, China <sup>7</sup>       | ★                                              | ★                                       | ★                       | ★                                                               | ★★                                                         | ★                      | —                                                         | —                                       | 7                          |
| Dehal A, 2011, USA <sup>8</sup>          | ★                                              | ★                                       | ★                       | ★                                                               | ★★                                                         | —                      | ★                                                         | ★                                       | 8                          |
| Parr CL, 2010, Norway <sup>9</sup>       | —                                              | ★                                       | ★                       | ★                                                               | ★★                                                         | ★                      | ★                                                         | ★                                       | 8                          |
| Andreotti G, 2010, USA <sup>10</sup>     | —                                              | ★                                       | ★                       | ★                                                               | ★★                                                         | ★                      | ★                                                         | —                                       | 7                          |
| Koh WP, 2010, China <sup>11</sup>        | ★                                              | ★                                       | ★                       | ★                                                               | ★★                                                         | ★                      | —                                                         | ★                                       | 8                          |
| Song YM, 2008, Korea <sup>12</sup>       | —                                              | ★                                       | ★                       | ★                                                               | ★★                                                         | ★                      | —                                                         | —                                       | 6                          |
| Kabat GC, 2008, USA <sup>13</sup>        | ★                                              | ★                                       | ★                       | ★                                                               | ★★                                                         | ★                      | ★                                                         | ★                                       | 9                          |
| Jee SH, 2008, Korea <sup>14</sup>        | ★                                              | ★                                       | ★                       | ★                                                               | ★★                                                         | ★                      | ★                                                         | ★                                       | 9                          |
| Kabat GC, 2007, USA <sup>15</sup>        | —                                              | ★                                       | ★                       | ★                                                               | ★★                                                         | —                      | ★                                                         | —                                       | 6                          |
| Reeves GK, 2007, UK <sup>16</sup>        | ★                                              | ★                                       | ★                       | ★                                                               | ★★                                                         | ★                      | ★                                                         | ★                                       | 9                          |
| Samanic C, 2006, Sweden <sup>17</sup>    | —                                              | ★                                       | ★                       | ★                                                               | ★★                                                         | ★                      | ★                                                         | ★                                       | 8                          |
| Lukanova A, 2006, Sweden <sup>18</sup>   | ★                                              | ★                                       | ★                       | ★                                                               | ★★                                                         | —                      | ★                                                         | —                                       | 7                          |
| Batty GD, 2005, UK <sup>19</sup>         | ★                                              | ★                                       | ★                       | ★                                                               | ★★                                                         | ★                      | ★                                                         | ★                                       | 9                          |
| Kuriyama S, 2005, Japan <sup>20</sup>    | ★                                              | ★                                       | ★                       | ★                                                               | ★★                                                         | —                      | ★                                                         | —                                       | 7                          |
| Rapp K, 2005, Austria <sup>21</sup>      | ★                                              | ★                                       | ★                       | ★                                                               | ★★                                                         | ★                      | ★                                                         | —                                       | 8                          |
| Oh SW, 2005, Korea <sup>22</sup>         | ★                                              | ★                                       | ★                       | ★                                                               | ★★                                                         | ★                      | —                                                         | ★                                       | 8                          |
| Liu EJ, 2004, China <sup>23</sup>        | —                                              | ★                                       | ★                       | ★                                                               | ★★                                                         | —                      | ★                                                         | ★                                       | 7                          |
| Calle EE, 2003, USA <sup>24</sup>        | —                                              | ★                                       | ★                       | ★                                                               | ★★                                                         | ★                      | ★                                                         | ★                                       | 8                          |
| Olson JE, 2002, USA <sup>25</sup>        | ★                                              | ★                                       | ★                       | ★                                                               | ★★                                                         | ★                      | ★                                                         | —                                       | 8                          |
| Drinkard CR, 1995, USA <sup>26</sup>     | ★                                              | ★                                       | ★                       | ★                                                               | ★★                                                         | ★                      | —                                                         | —                                       | 7                          |
| Kark JD, 1995, Israel <sup>27</sup>      | —                                              | ★                                       | ★                       | ★                                                               | ★★                                                         | —                      | ★                                                         | ★                                       | 7                          |
| Chyou PH, 1994, USA <sup>28</sup>        | —                                              | ★                                       | ★                       | ★                                                               | ★★                                                         | ★                      | ★                                                         | ★                                       | 8                          |

|                                      |   |   |   |   |    |   |   |   |   |
|--------------------------------------|---|---|---|---|----|---|---|---|---|
| Knekt P, 1991, Finland <sup>29</sup> | — | ★ | ★ | ★ | ★★ | ★ | ★ | ★ | 8 |
|--------------------------------------|---|---|---|---|----|---|---|---|---|

\* A study can be awarded a maximum of one star for each item, except for the item ‘control for important factors or additional factors’.

†A maximum of two stars can be awarded for this item. Studies controlling for BMI : hip ratio were awarded one star, while studies controlling for other important confounders including smoking, age, physical activity and alcohol consumption were awarded an additional star.

‡Duration of 10 years was the predefined follow-up duration long enough for outcomes to occur, and a cohort study with follow-up duration  $\geq 10$  years was awarded one star.

§A cohort study with a follow-up rate of more than 75% was awarded one star.

## References

1. Guo, L. et al. [Body mass index and cancer incidence:a prospective cohort study in northern China]. *Zhonghua liu xing bing xue za zhi = Zhonghua liuxingbingxue zazhi* **35**, 231-236 (2014).
2. Everatt, R., Virviciute, D., Kuzmickiene, I. & Tamosiunas, A. Body mass index, cholesterol level and risk of lung cancer in Lithuanian men. *Lung cancer* **85**, 361-365 (2014).
3. Bethea, T.N. et al. Obesity in relation to lung cancer incidence in African American women. *Cancer causes & control : CCC* **24**, 1695-1703 (2013).
4. Hatlen, P., Langhammer, A., Forsmo, S., Carlsen, S.M. & Amdun, T. Bone mass density, fracture history, self-reported osteoporosis as proxy variables for estrogen and the risk of non-small-cell lung cancer--a population based cohort study, the HUNT study: are proxy variables friends or faults? *Lung cancer* **81**, 39-46 (2013).
5. Lam, T.K. et al. Anthropometric measures and physical activity and the risk of lung cancer in never-smokers: a prospective cohort study. *PloS one* **8**, e70672 (2013).
6. Smith, L. et al. Body mass index and risk of lung cancer among never, former, and current smokers. *Journal of the National Cancer Institute* **104**, 778-789 (2012).
7. Leung, C.C. et al. Lower lung cancer mortality in obesity. *International journal of epidemiology* **40**, 174-182 (2011).
8. Dehal, A. et al. Body mass index and death rate of colorectal cancer among a national cohort of U.S. adults. *Nutrition and cancer* **63**, 1218-1225 (2011).
9. Parr, C.L. et al. Body-mass index and cancer mortality in the Asia-Pacific Cohort Studies Collaboration: pooled analyses of 424 519 participants. *Lancet Oncology* **11**, 741-752 (2010).
10. Andreotti, G. et al. Body mass index, agricultural pesticide use, and cancer incidence in the Agricultural Health Study cohort. *Cancer causes & control : CCC* **21**, 1759-1775 (2010).
11. Koh, W.P., Yuan, J.M., Wang, R., Lee, H.P. & Yu, M.C. Body mass index and smoking-related lung cancer risk in the Singapore Chinese Health Study. *British journal of cancer* **102**, 610-614 (2010).
12. Song, Y.M., Sung, J. & Ha, M. Obesity and risk of cancer in postmenopausal Korean women. *Journal of clinical oncology : official journal of the American Society of Clinical Oncology* **26**, 3395-3402 (2008).
13. Kabat, G.C., Kim, M., Hunt, J.R., Chlebowski, R.T. & Rohan, T.E. Body mass index and waist circumference in relation to lung cancer risk in the Women's Health Initiative. *American journal of epidemiology* **168**, 158-169 (2008).
14. Jee, S.H. et al. Body mass index and cancer risk in Korean men and women. *Int J Cancer* **123**, 1892-1896 (2008).
15. Kabat, G.C., Miller, A.B. & Rohan, T.E. Body mass index and lung cancer risk in women. *Epidemiology* **18**, 607-612 (2007).
16. Reeves, G.K. et al. Cancer incidence and mortality in relation to body mass index in the Million Women Study: cohort study. *Bmj* **335**, 1134 (2007).
17. Samanic, C., Chow, W.H., Gridley, G., Jarvholm, B. & Fraumeni, J.F., Jr. Relation of body mass index to cancer risk in 362,552 Swedish men. *Cancer causes & control : CCC* **17**, 901-909 (2006).
18. Lukanova, A. et al. Body mass index and cancer: results from the Northern Sweden Health and Disease Cohort. *Int J Cancer* **118**, 458-466 (2006).
19. Batty, G.D. et al. Obesity and overweight in relation to organ-specific cancer mortality in London (UK): findings from the original Whitehall study. *International journal of obesity* **29**, 1267-1274 (2005).
20. Kuriyama, S. et al. Obesity and risk of cancer in Japan. *Int J Cancer* **113**, 148-157 (2005).

21. Rapp, K. et al. Obesity and incidence of cancer: a large cohort study of over 145,000 adults in Austria. *British journal of cancer* **93**, 1062-1067 (2005).
22. Oh, S.W., Yoon, Y.S. & Shin, S.A. Effects of excess weight on cancer incidences depending on cancer sites and histologic findings among men: Korea National Health Insurance Corporation Study. *Journal of clinical oncology : official journal of the American Society of Clinical Oncology* **23**, 4742-4754 (2005).
23. Liu, E., Wang, X., Yuan, J. & Gao, Y. Association of body mass index with risk of lung cancer: Evidence from a middle-aged male cohort in Shanghai, China. *Chinese J Clin Oncol* **2**, 90-95 (2004).
24. Calle, E.E., Rodriguez, C., Walker-Thurmond, K. & Thun, M.J. Overweight, obesity, and mortality from cancer in a prospectively studied cohort of U.S. adults. *The New England journal of medicine* **348**, 1625-1638 (2003).
25. Olson, J.E. et al. Differential association of body mass index and fat distribution with three major histologic types of lung cancer: evidence from a cohort of older women. *American journal of epidemiology* **156**, 606-615 (2002).
26. Drinkard, C.R. et al. Association of body mass index and body fat distribution with risk of lung cancer in older women. *American journal of epidemiology* **142**, 600-607 (1995).
27. Kark, J.D., Yaari, S., Rasooly, I. & Goldbourt, U. Are lean smokers at increased risk of lung cancer? The Israel Civil Servant Cancer Study. *Archives of internal medicine* **155**, 2409-2416 (1995).
28. Chyou, P.H., Nomura, A.M. & Stemmermann, G.N. A prospective study of weight, body mass index and other anthropometric measurements in relation to site-specific cancers. *Int J Cancer* **57**, 313-317 (1994).
29. Knekt, P. et al. Leanness and lung-cancer risk. *Int J Cancer* **49**, 208-213 (1991).
